# Supplementary material for: Viral and bacterial co-infection in severe pneumonia triggers innate immune responses and specifically enhances IP-10: a translational study
Source: PubMed Central journal article supplement (PMC5138590; doi:10.1038/srep38532), 2016-12-06
Supplement: srep38532-s1.pdf [file srep38532-s1.pdf]

## SUPPLEMENTARY INFORMATION

*Viral and bacterial co-infection in severe pneumonia triggers innate immune responses and specifically enhances IP-10: a translational study.* Jonathan Hoffmann<sup>1</sup>, Daniela Machado<sup>1</sup>, Olivier Terrier<sup>2</sup>, Stephane Pouzol<sup>1</sup>, Mélina Messaoudi<sup>1</sup>, Wilma Basualdo<sup>3</sup>, Emilio E Espínola<sup>4</sup>, Rosa M. Guillen<sup>4</sup>, Manuel Rosa-Calatrava<sup>2</sup>, Valentina Picot<sup>1</sup>, Thomas Bénet<sup>5</sup>, Hubert Endtz<sup>1</sup>, Graciela Russomando<sup>4</sup>, Gláucia Paranhos-Baccalà<sup>1\*</sup>.

**Figure S1**

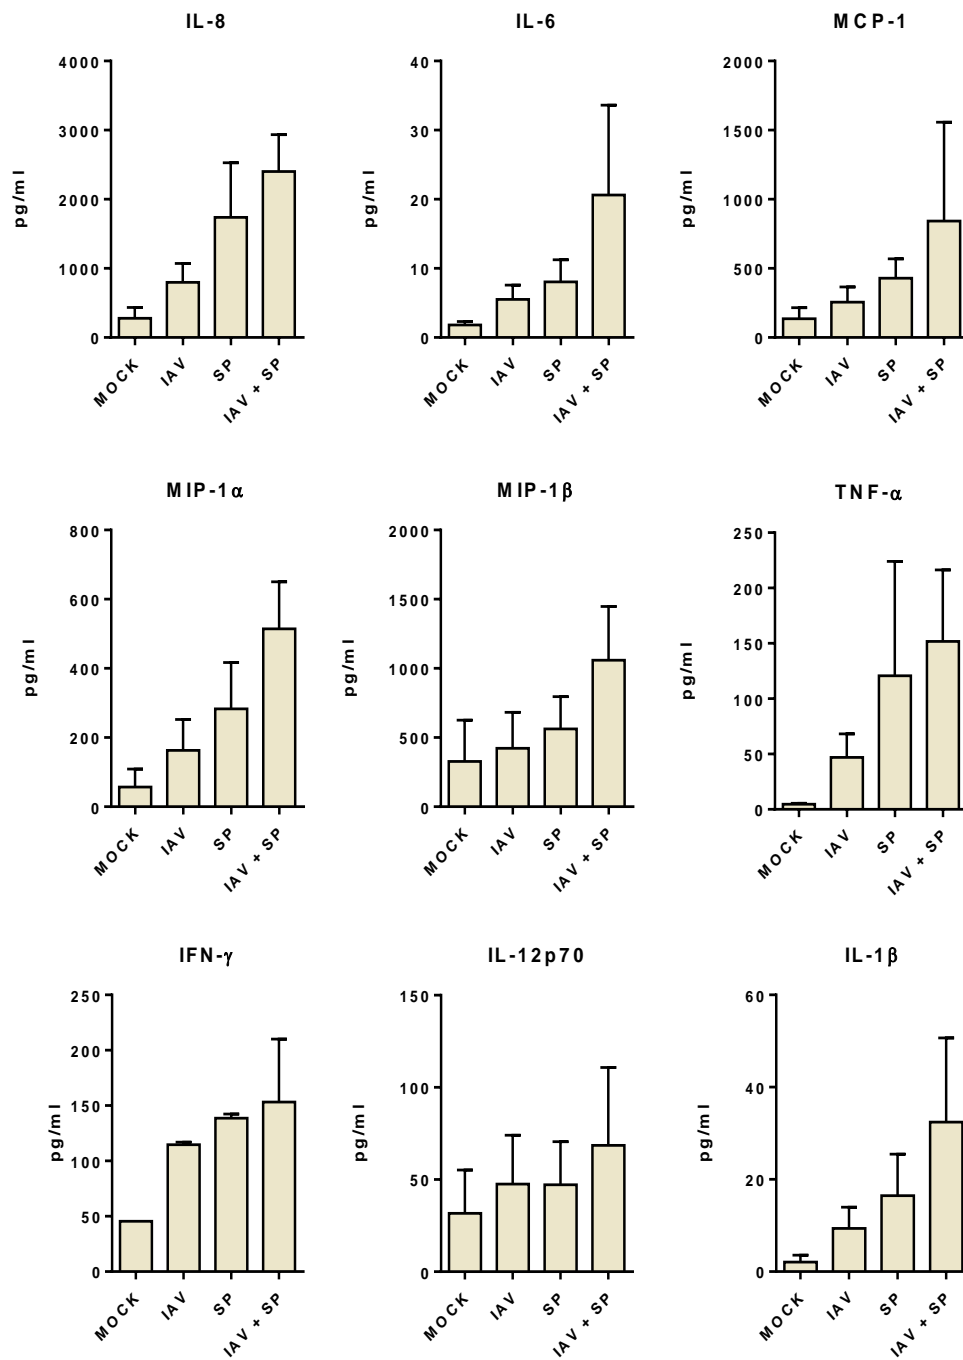

**Figure S1 legend: Cytokine and chemokine responses of MDMs after single or mixed infection with IAV and SP.**

Preceding IAV infection leads to elevated secretion of pro-inflammatory cytokines and chemokines after co-infection with SP. MDMs were infected with or without IAV for 4 hours, then infected with or without SP, incubated for 20 h, and the concentrations of 27 cytokines and chemokines in the cell supernatants were measured using a quantitative multiplex immunoassay. A selection of deregulated expression profiles at 24 hours post-infection is shown: IP-10, IL-8, IL-6, MCP-1, MIP-1 $\alpha$ , MIP-1 $\beta$ , TNF- $\alpha$ , IFN- $\gamma$  and IL-12p70. Values are mean ( $\pm$  SEM) of three independent experiments. Statistical analyses were performed using one-way ANOVA with Tukey's post-hoc test.

**Table S1: Complete mRNA expression dataset of human monocyte-derived macrophages**

following single or mixed IAV and/or SP infection.

| Gene    | Description                                                                         | Fold Change<br>(comparing to control group) |       |          |
|---------|-------------------------------------------------------------------------------------|---------------------------------------------|-------|----------|
|         |                                                                                     | IAV                                         | SP    | IAV + SP |
| CXCL10  | Chemokine (C-X-C motif) ligand 10                                                   | 67,9                                        | 183,5 | 240,9    |
| MX1     | Myxovirus (influenza virus) resistance 1, interferon-inducible protein p78 (mouse)  | 134,0                                       | 120,3 | 151,4    |
| IL1B    | Interleukin 1, beta                                                                 | 0,6                                         | 61,4  | 59,4     |
| IL23A   | Interleukin 23, alpha subunit p19                                                   | 3,3                                         | 68,1  | 56,2     |
| CD80    | CD80 molecule                                                                       | 2,4                                         | 49,5  | 54,3     |
| STAT1   | Signal transducer and activator of transcription 1, 91kDa                           | 31,0                                        | 44,2  | 52,3     |
| CCL2    | Chemokine (C-C motif) ligand 2                                                      | 2,2                                         | 26,9  | 34,6     |
| DDX58   | DEAD (Asp-Glu-Ala-Asp) box polypeptide 58                                           | 11,2                                        | 19,3  | 22,2     |
| STAT4   | Signal transducer and activator of transcription 4                                  | 1,7                                         | 16,4  | 15,8     |
| IL10    | Interleukin 10                                                                      | 1,3                                         | 11,6  | 10,6     |
| IRF7    | Interferon regulatory factor 7                                                      | 6,6                                         | 6,1   | 6,8      |
| CSF2    | Colony stimulating factor 2 (granulocyte-macrophage)                                | 0,7                                         | 5,7   | 6,3      |
| IL8     | Interleukin 8                                                                       | 0,1                                         | 7,1   | 6,2      |
| LYZ     | Lysozyme                                                                            | 12,0                                        | 6,6   | 5,5      |
| IFNB1   | Interferon, beta 1, fibroblast                                                      | 2,3                                         | 5,1   | 5,2      |
| ICAM1   | Intercellular adhesion molecule 1                                                   | 0,5                                         | 5,0   | 4,7      |
| CD40    | CD40 molecule, TNF receptor superfamily member 5                                    | 0,9                                         | 4,4   | 4,7      |
| IL6     | Interleukin 6 (interferon, beta 2)                                                  | 0,7                                         | 3,7   | 4,0      |
| TNF     | Tumor necrosis factor                                                               | 0,5                                         | 3,7   | 3,7      |
| IL1R1   | Interleukin 1 receptor, type I                                                      | 0,4                                         | 3,9   | 3,5      |
| NFKB1   | Nuclear factor of kappa light polypeptide gene enhancer in B-cells 1                | 1,1                                         | 3,4   | 3,4      |
| CCL5    | Chemokine (C-C motif) ligand 5                                                      | 0,8                                         | 3,5   | 3,4      |
| NFKBIA  | Nuclear factor of kappa light polypeptide gene enhancer in B-cells inhibitor, alpha | 0,4                                         | 3,4   | 3,2      |
| CCR4    | Chemokine (C-C motif) receptor 4                                                    | 1,1                                         | 2,5   | 3,1      |
| MYD88   | Myeloid differentiation primary response gene (88)                                  | 2,1                                         | 2,3   | 2,9      |
| TLR8    | Toll-like receptor 8                                                                | 0,8                                         | 2,4   | 2,4      |
| TLR9    | Toll-like receptor 9                                                                | 3,9                                         | 2,4   | 2,1      |
| IL1A    | Interleukin 1, alpha                                                                | 0,5                                         | 3,7   | 2,1      |
| FOXP3   | Forkhead box P3                                                                     | 1,8                                         | 2,4   | 2,1      |
| CASP1   | Caspase 1, apoptosis-related cysteine peptidase (interleukin 1, beta, convertase)   | 1,5                                         | 2,0   | 2,0      |
| TYK2    | Tyrosine kinase 2                                                                   | 1,3                                         | 2,0   | 1,9      |
| TICAM1  | Toll-like receptor adaptor molecule 1                                               | 1,2                                         | 2,2   | 1,9      |
| NOD2    | Nucleotide-binding oligomerization domain containing 2                              | 1,4                                         | 1,8   | 1,8      |
| IRF3    | Interferon regulatory factor 3                                                      | 1,3                                         | 1,6   | 1,8      |
| HLA-A   | Major histocompatibility complex, class I, A                                        | 1,5                                         | 1,6   | 1,7      |
| TLR2    | Toll-like receptor 2                                                                | 1,2                                         | 1,5   | 1,5      |
| STAT6   | Signal transducer and activator of transcription 6, interleukin-4 induced           | 1,6                                         | 1,4   | 1,5      |
| IL5     | Interleukin 5 (colony-stimulating factor, eosinophil)                               | 0,7                                         | 1,1   | 1,4      |
| STAT3   | Signal transducer and activator of transcription 3 (acute-phase response factor)    | 1,1                                         | 1,3   | 1,3      |
| NLRP3   | NLR family, pyrin domain containing 3                                               | 1,1                                         | 1,2   | 1,3      |
| IFNAR1  | Interferon (alpha, beta and omega) receptor 1                                       | 0,6                                         | 1,4   | 1,2      |
| HLA-E   | Major histocompatibility complex, class I, E                                        | 1,3                                         | 1,1   | 1,2      |
| CXCR3   | Chemokine (C-X-C motif) receptor 3                                                  | 0,6                                         | 1,4   | 1,2      |
| NOD1    | Nucleotide-binding oligomerization domain containing 1                              | 1,4                                         | 1,0   | 1,1      |
| CD14    | CD14 molecule                                                                       | 0,9                                         | 1,2   | 1,1      |
| IL18    | Interleukin 18 (interferon-gamma-inducing factor)                                   | 0,9                                         | 1,2   | 1,1      |
| APCS    | Amyloid P component, serum                                                          | 0,7                                         | 1,1   | 1,0      |
| CCR6    | Chemokine (C-C motif) receptor 6                                                    | 0,7                                         | 1,1   | 1,0      |
| CCR8    | Chemokine (C-C motif) receptor 8                                                    | 0,7                                         | 1,1   | 1,0      |
| CD40LG  | CD40 ligand                                                                         | 0,7                                         | 1,1   | 1,0      |
| CD8A    | CD8a molecule                                                                       | 0,7                                         | 1,1   | 1,0      |
| CRP     | C-reactive protein, pentraxin-related                                               | 0,7                                         | 1,1   | 1,0      |
| FASLG   | Fas ligand (TNF superfamily, member 6)                                              | 0,7                                         | 1,1   | 1,0      |
| GATA3   | GATA binding protein 3                                                              | 0,7                                         | 1,1   | 1,0      |
| IFNA1   | Interferon, alpha 1                                                                 | 0,7                                         | 1,1   | 1,0      |
| IFNG    | Interferon, gamma                                                                   | 0,7                                         | 1,1   | 1,0      |
| IL13    | Interleukin 13                                                                      | 0,7                                         | 1,1   | 1,0      |
| IL17A   | Interleukin 17A                                                                     | 0,7                                         | 1,1   | 1,0      |
| IL2     | Interleukin 2                                                                       | 0,7                                         | 1,1   | 1,0      |
| IL4     | Interleukin 4                                                                       | 0,7                                         | 1,1   | 1,0      |
| MBL2    | Mannose-binding lectin (protein C) 2, soluble                                       | 0,7                                         | 1,1   | 1,0      |
| MPO     | Myeloperoxidase                                                                     | 1,7                                         | 1,1   | 1,0      |
| RORC    | RAR-related orphan receptor C                                                       | 0,7                                         | 1,1   | 1,0      |
| TBX21   | T-box 21                                                                            | 0,7                                         | 1,1   | 1,0      |
| TLR3    | Toll-like receptor 3                                                                | 1,1                                         | 0,8   | 1,0      |
| CD4     | CD4 molecule                                                                        | 1,6                                         | 1,1   | 1,0      |
| TLR5    | Toll-like receptor 5                                                                | 1,3                                         | 1,1   | 1,0      |
| CCR5    | Chemokine (C-C motif) receptor 5                                                    | 4,4                                         | 1,1   | 1,0      |
| CD86    | CD86 molecule                                                                       | 1,2                                         | 0,9   | 1,0      |
| LY96    | Lymphocyte antigen 96                                                               | 0,9                                         | 1,0   | 1,0      |
| C3      | Complement component 3                                                              | 0,7                                         | 1,0   | 0,9      |
| IRAK1   | Interleukin-1 receptor-associated kinase 1                                          | 1,2                                         | 0,9   | 0,9      |
| MAPK1   | Mitogen-activated protein kinase 1                                                  | 0,9                                         | 1,1   | 0,9      |
| TRAF6   | TNF receptor-associated factor 6                                                    | 1,0                                         | 1,0   | 0,9      |
| JAK2    | Janus kinase 2                                                                      | 0,8                                         | 0,7   | 0,7      |
| TLR1    | Toll-like receptor 1                                                                | 0,6                                         | 0,6   | 0,7      |
| MAPK8   | Mitogen-activated protein kinase 8                                                  | 0,7                                         | 0,8   | 0,7      |
| IFNGR1  | Interferon gamma receptor 1                                                         | 0,7                                         | 0,6   | 0,5      |
| RAG1    | Recombination activating gene 1                                                     | 0,7                                         | 0,4   | 0,5      |
| SLC11A1 | Solute carrier family 11 (proton-coupled divalent metal ion transporters), member 1 | 1,5                                         | 0,4   | 0,4      |
| TLR6    | Toll-like receptor 6                                                                | 0,5                                         | 0,4   | 0,4      |
| TLR4    | Toll-like receptor 4                                                                | 0,8                                         | 0,4   | 0,4      |
| ITGAM   | Integrin, alpha M (complement component 3 receptor 3 subunit)                       | 0,5                                         | 0,3   | 0,2      |
| TLR7    | Toll-like receptor 7                                                                | 0,7                                         | 0,2   | 0,2      |

**Table S2: Complete microRNA expression dataset of human monocyte-derived macrophages**

following single or mixed IAV and/or SP infection.

| Human microRNA  | Fold Change (comparing to control group) |     |            |
|-----------------|------------------------------------------|-----|------------|
|                 | IAV                                      | SP  | IAV + SP   |
| hsa-miR-200a-3p | 6,9                                      | 3,7 | <b>7,3</b> |
| hsa-miR-298     | 3,3                                      | 1,1 | <b>4,8</b> |
| hsa-miR-130a-3p | 5,4                                      | 1,9 | <b>4,8</b> |
| hsa-miR-20b-5p  | 1,9                                      | 4,9 | <b>4,7</b> |
| hsa-miR-196a-5p | 2,0                                      | 2,3 | <b>4,3</b> |
| hsa-miR-147a    | 2,3                                      | 2,0 | <b>4,1</b> |
| hsa-miR-138-5p  | 2,6                                      | 2,7 | <b>3,9</b> |
| hsa-miR-135a-5p | 1,4                                      | 2,0 | <b>3,8</b> |
| hsa-let-7c-5p   | 1,2                                      | 2,9 | <b>3,7</b> |
| hsa-miR-194-5p  | 2,8                                      | 1,2 | <b>3,7</b> |
| hsa-miR-451a    | 1,9                                      | 3,1 | <b>3,6</b> |
| hsa-miR-205-5p  | 4,1                                      | 0,5 | <b>3,1</b> |
| hsa-miR-183-5p  | 3,0                                      | 1,8 | <b>2,8</b> |
| hsa-miR-19b-3p  | 1,6                                      | 2,1 | <b>2,6</b> |
| hsa-miR-195-5p  | 1,4                                      | 1,9 | <b>2,6</b> |
| hsa-miR-17-5p   | 1,4                                      | 2,2 | <b>2,5</b> |
| hsa-let-7e-5p   | 1,2                                      | 1,8 | <b>2,5</b> |
| hsa-miR-16-5p   | 1,7                                      | 1,5 | <b>2,4</b> |
| hsa-miR-20a-5p  | 1,3                                      | 2,3 | <b>2,3</b> |
| hsa-miR-31-5p   | 2,1                                      | 2,3 | <b>2,3</b> |
| hsa-miR-182-5p  | 1,9                                      | 1,7 | <b>2,2</b> |
| hsa-miR-155-5p  | 3,0                                      | 1,3 | <b>2,2</b> |
| hsa-miR-142-3p  | 1,4                                      | 2,3 | <b>2,1</b> |
| hsa-miR-29c-3p  | 1,3                                      | 2,1 | <b>2,1</b> |
| hsa-miR-18a-5p  | 1,1                                      | 1,9 | <b>2,1</b> |
| hsa-let-7a-5p   | 1,1                                      | 1,4 | <b>2,1</b> |
| hsa-let-7d-5p   | 1,0                                      | 1,8 | <b>2,0</b> |
| hsa-miR-19a-3p  | 1,4                                      | 1,6 | <b>2,0</b> |
| hsa-miR-30b-5p  | 1,3                                      | 1,6 | <b>2,0</b> |
| hsa-miR-34a-5p  | 1,2                                      | 2,3 | <b>1,9</b> |
| hsa-miR-363-3p  | 0,9                                      | 1,7 | 1,9        |
| hsa-miR-148a-3p | 1,4                                      | 1,0 | 1,9        |
| hsa-miR-186-5p  | 1,1                                      | 1,4 | 1,9        |
| hsa-miR-149-5p  | 1,7                                      | 0,9 | 1,8        |
| hsa-miR-135b-5p | 3,6                                      | 2,1 | 1,8        |
| hsa-miR-181a-5p | 0,9                                      | 2,0 | 1,8        |
| hsa-let-7g-5p   | 1,6                                      | 1,4 | 1,8        |
| hsa-miR-126-3p  | 1,2                                      | 1,3 | 1,7        |
| hsa-miR-21-5p   | 2,0                                      | 1,2 | 1,7        |
| hsa-miR-210-3p  | 0,9                                      | 1,1 | 1,7        |
| hsa-miR-29b-3p  | 1,0                                      | 2,1 | 1,7        |
| hsa-miR-98-5p   | 1,6                                      | 1,3 | 1,7        |
| hsa-miR-26b-5p  | 1,5                                      | 1,3 | 1,7        |
| hsa-miR-27b-3p  | 1,4                                      | 1,3 | 1,6        |
| hsa-miR-27a-3p  | 1,0                                      | 1,4 | 1,6        |
| hsa-miR-379-5p  | 1,7                                      | 0,7 | 1,6        |
| hsa-miR-15a-5p  | 0,9                                      | 1,9 | 1,5        |
| hsa-miR-128-3p  | 1,2                                      | 1,6 | 1,5        |
| hsa-miR-15b-5p  | 1,3                                      | 1,5 | 1,5        |
| hsa-miR-142-5p  | 1,0                                      | 2,8 | 1,5        |
| hsa-miR-146a-5p | 1,5                                      | 1,4 | 1,5        |
| hsa-miR-335-5p  | 2,4                                      | 0,5 | 1,5        |
| hsa-miR-103a-3p | 1,2                                      | 1,5 | 1,4        |
| hsa-miR-30e-5p  | 1,0                                      | 1,3 | 1,4        |
| hsa-miR-134-5p  | 0,8                                      | 1,1 | 1,4        |
| hsa-miR-152-3p  | 1,2                                      | 1,0 | 1,4        |
| hsa-miR-409-3p  | 2,0                                      | 0,5 | 1,4        |
| hsa-miR-223-3p  | 1,6                                      | 1,3 | 1,3        |
| hsa-miR-9-5p    | 1,5                                      | 0,8 | 1,3        |
| hsa-miR-214-3p  | 0,4                                      | 1,7 | 1,3        |
| hsa-miR-99b-5p  | 1,3                                      | 1,0 | 1,2        |
| hsa-miR-493-3p  | 1,0                                      | 1,5 | 1,2        |
| hsa-miR-145-5p  | 1,0                                      | 1,7 | 1,2        |
| hsa-miR-574-3p  | 1,1                                      | 1,1 | 1,2        |
| hsa-miR-185-5p  | 1,3                                      | 1,1 | 1,2        |
| hsa-miR-18b-5p  | 1,2                                      | 1,0 | 1,1        |
| hsa-miR-143-3p  | 1,0                                      | 1,4 | 1,1        |
| hsa-miR-23b-3p  | 1,3                                      | 1,1 | 1,1        |
| hsa-miR-30c-5p  | 1,2                                      | 0,9 | 1,1        |
| hsa-miR-187-3p  | 0,9                                      | 0,9 | 1,1        |
| hsa-miR-191-5p  | 1,0                                      | 1,1 | 1,0        |
| hsa-miR-132-3p  | 1,1                                      | 0,9 | 1,0        |
| hsa-miR-383-5p  | 1,7                                      | 0,5 | 0,9        |
| hsa-miR-26a-5p  | 1,2                                      | 1,1 | 0,9        |
| hsa-miR-125a-5p | 1,2                                      | 0,9 | 0,9        |
| hsa-miR-299-3p  | 1,7                                      | 0,5 | 0,9        |
| hsa-miR-105-5p  | 1,7                                      | 1,0 | 0,8        |
| hsa-miR-302a-3p | 0,8                                      | 1,5 | 0,8        |
| hsa-miR-125b-5p | 0,8                                      | 1,2 | 0,7        |
| hsa-miR-325     | 1,3                                      | 0,6 | 0,6        |
| hsa-miR-150-5p  | 1,7                                      | 0,5 | 0,5        |
| hsa-miR-184     | 1,7                                      | 0,5 | 0,5        |
| hsa-miR-203a-3p | 1,7                                      | 0,5 | 0,5        |
| hsa-miR-206     | 1,7                                      | 0,5 | 0,5        |

**Table S3: Diagnostic accuracy values of the main significant blood-based biomarkers allowing differentiation between non-severe of severe pneumonia cases.**

| Serum-based biomarker | AUC  | SE   | [95% CI]      | <i>P</i>        | Cut-off value | Sen. (%) | Spe. (%) | LR   |
|-----------------------|------|------|---------------|-----------------|---------------|----------|----------|------|
| <b>PCT</b>            | 0.70 | 0.06 | [0.58 - 0.82] | <b>&lt;0.01</b> | >0.68         | 70.0     | 70.4     | 2.37 |
| <b>IP-10</b>          | 0.69 | 0.06 | [0.57 - 0.82] | <b>&lt;0.01</b> | > 4,240       | 63.3     | 63.6     | 1.74 |
| <b>IL-6</b>           | 0.70 | 0.07 | [0.58 - 0.83] | <b>&lt;0.01</b> | > 250.7       | 66.6     | 65.9     | 1.96 |
| <b>CRP</b>            | 0.67 | 0.07 | [0.54 - 0.79] | .02             | > 72.00       | 70.0     | 61.3     | 1.81 |
| <b>IL-8</b>           | 0.65 | 0.07 | [0.51 - 0.78] | .03             | > 88.70       | 63.3     | 63.6     | 1.74 |

AUC: area under curve; SE: standard error; CI: confidence interval; Sen.: Sensitivity; Spe.: Specificity; LR: likelihood ratio. Significant *P*-values ( $P < 0.05$ ) are in bold.
